# Supplementary material for: A novel dominant GJB2 (DFNA3) mutation in a Chinese family
Source: PubMed Central journal article supplement (PMC5244381; doi:10.1038/srep34425), 2017-01-19
Supplement: srep34425-s1.pdf [file srep34425-s1.pdf]

## **A novel dominant GJB2 (DFNA3) mutation in a Chinese family**

Hongyang Wang, Kaiwen Wu, Lan Yu, Linyi Xie, Wenping Xiong, Dayong Wang,

Jing Guan, Qiuju Wang\*

Institute of Otolaryngology, Chinese PLA General Hospital, Medical School of  
Chinese PLA, Beijing, 100853, China.

### **Corresponding author**

Email: \*[wqcr@263.net](mailto:wqcr@263.net).

**Supplementary Figure S1.** The ABR results of the propositus.

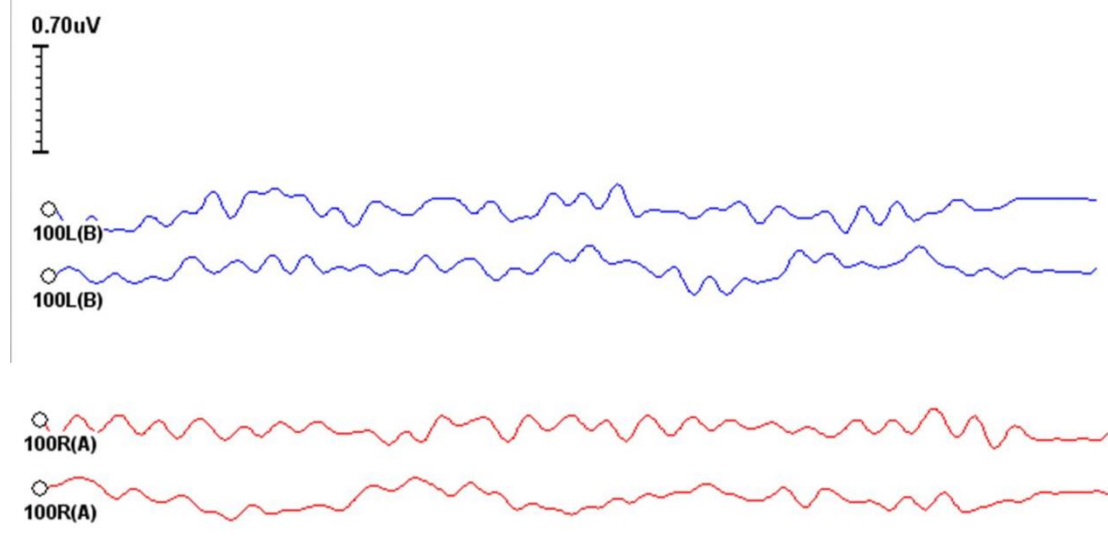

**Supplementary Figure S2.** Photos of the propositus showing absence of skin symptoms.

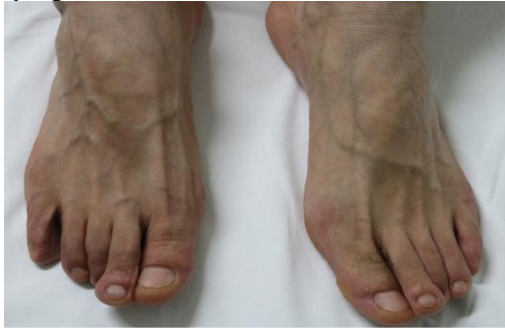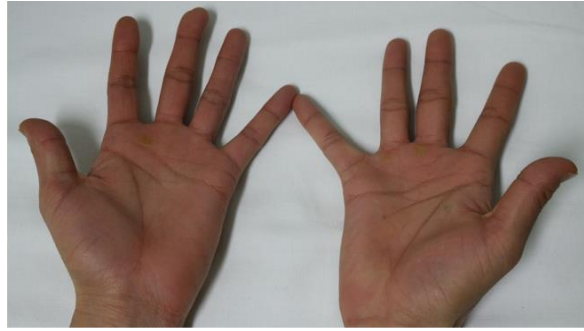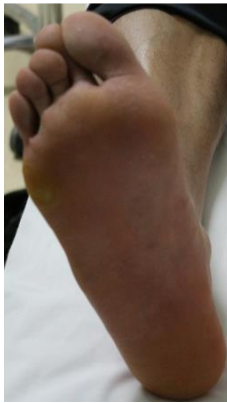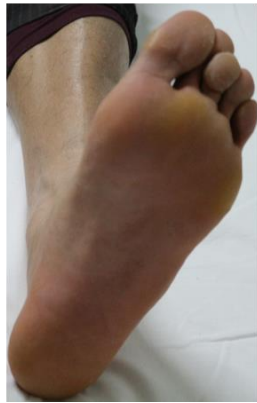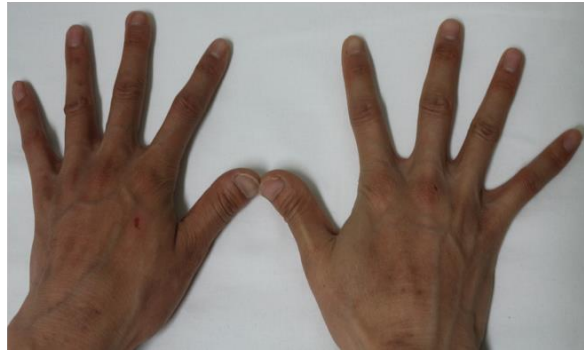

**Supplementary Figure S3.** DNA sequence chromatogram showing the heterozygous missense mutations c.524C>A in affected individuals and the c.235delC in IV:21.

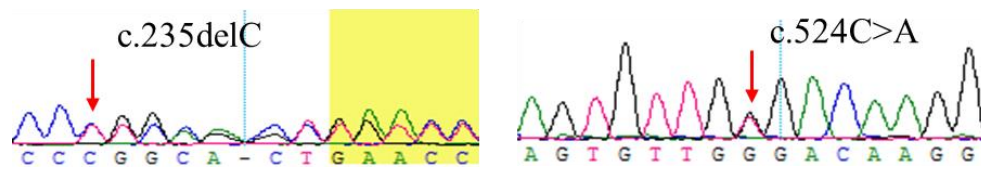

**Supplementary Figure S4.** Conservation analysis shows that the Pro residue at 175 in *GJB2* is conserved across.

|             |                            |     |
|-------------|----------------------------|-----|
| Human       | QRLVKCNAW <b>P</b> CPNTVDC | 175 |
| Ptrogodytes | QRLVKCNAW <b>P</b> CPNTVDC | 175 |
| Mmulatta    | QRLVKCNAW <b>P</b> CPNTVDC | 175 |
| Fcatus      | QRLVKCNAW <b>P</b> CPNTVDC | 175 |
| Mmusculus   | QRLVKCNAW <b>P</b> CPNTVDC | 175 |
| Xtropicalis | QRLVQCSNW <b>P</b> CPNVV   | 174 |
| Ggallus     | PRLMKCSAW <b>P</b> CPNTVDC | 175 |
| Drerio      | ARLVKCEQW <b>P</b> CPNKV   | 177 |

**Supplementary FigureS5.** The primer sequences and PCR cycle of *GJB2* gene.

**Primer information of GJB2 EXON2:** Product length 960bp

GJB2-Exon2- F : 5'- TTGGTGTGTTGCTCAGGAAGA-3'

GJB2-Exon2- R : 5'- GGCCTACAGGGGTTTCAAAT-3'

**GJB2 PCR Cycle:** (S1000 PCR Instrument-BIO-RAD)

94°C , 5min

1 cycle

94°C , 30sec

63-58°C , 40sec

72°C , 40sec

10 cycles

94°C , 30sec

58°C , 40sec

72°C , 40sec

27 cycles

72°C , 5 min

4°C , F

1 cycle
